# Supplementary material for: Evolutionary Analysis of Six Gene Families Part of the Reactive Oxygen Species (ROS) Gene Network in Three Brassicaceae Species
Source: MDPI journal article supplement (doi:10.3390/ijms25031938), 2024-02-05
Supplement: s1 [file s1]

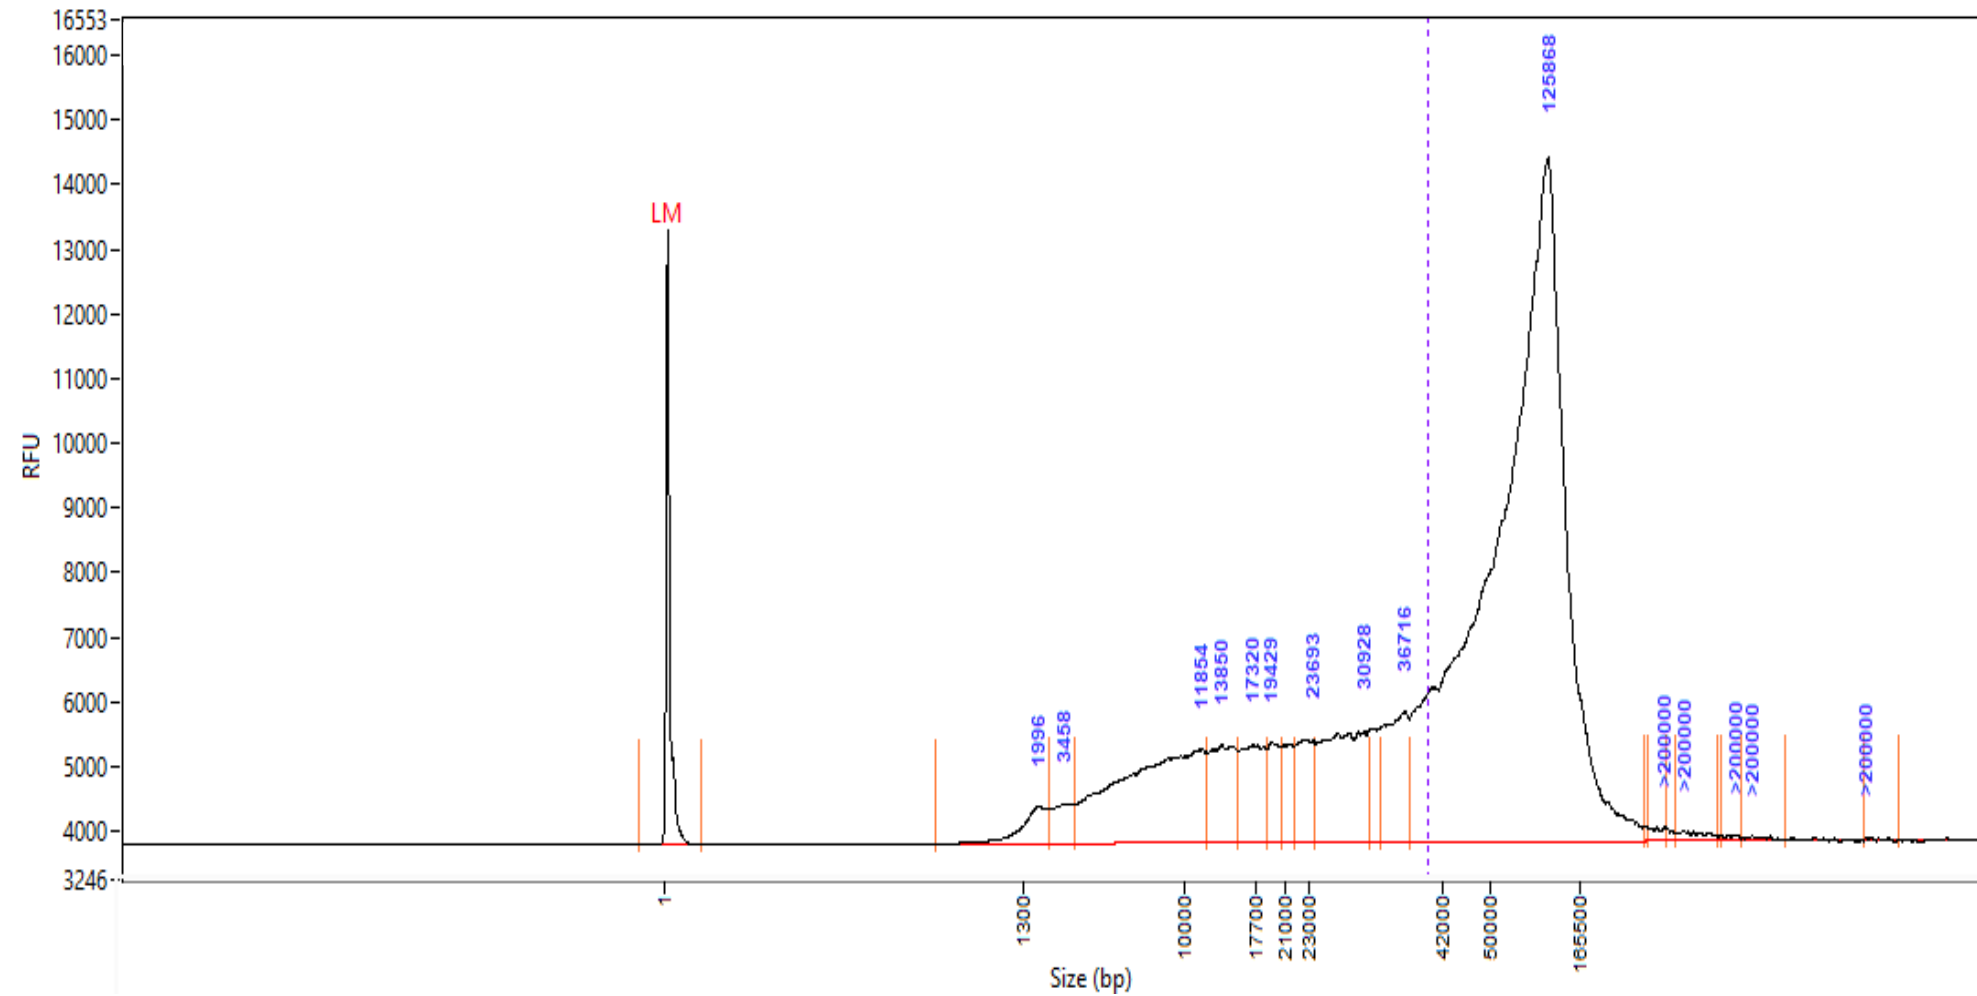

**Figure S1.** FemtoPulse<sup>®</sup> system (Agilent) electropherogram of *Nasturtium officinale* High Molecular Weight genomic DNA (gDNA) extracted with the Qiagen Genomic Tip protocol (see Material and Methods for details). Most of the gDNA fragments are larger than 90 kb.

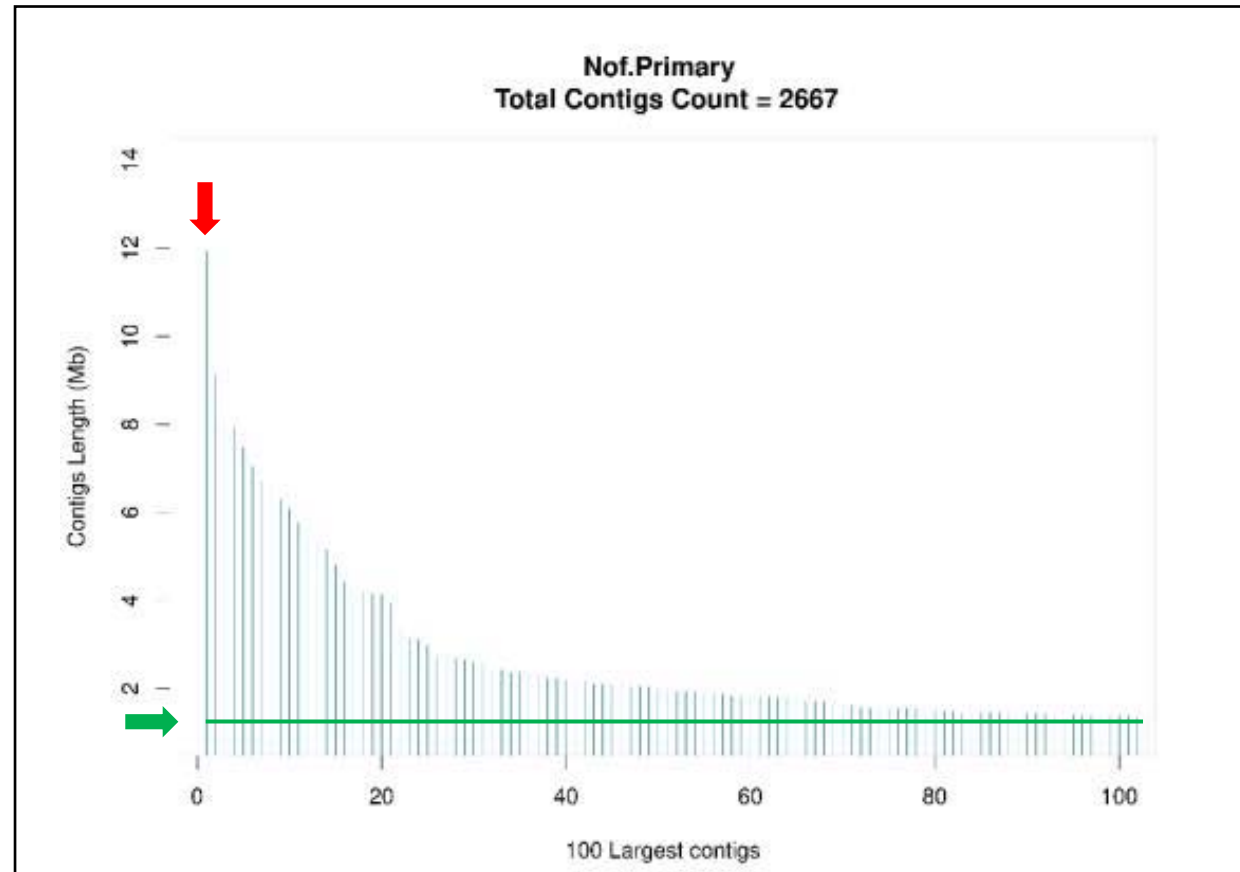

**Figure S2.** Distribution of contigs according to their length: the largest one is almost 12 Mb in length (red arrow) and 50% of them are larger than 1 Mb (green arrow).

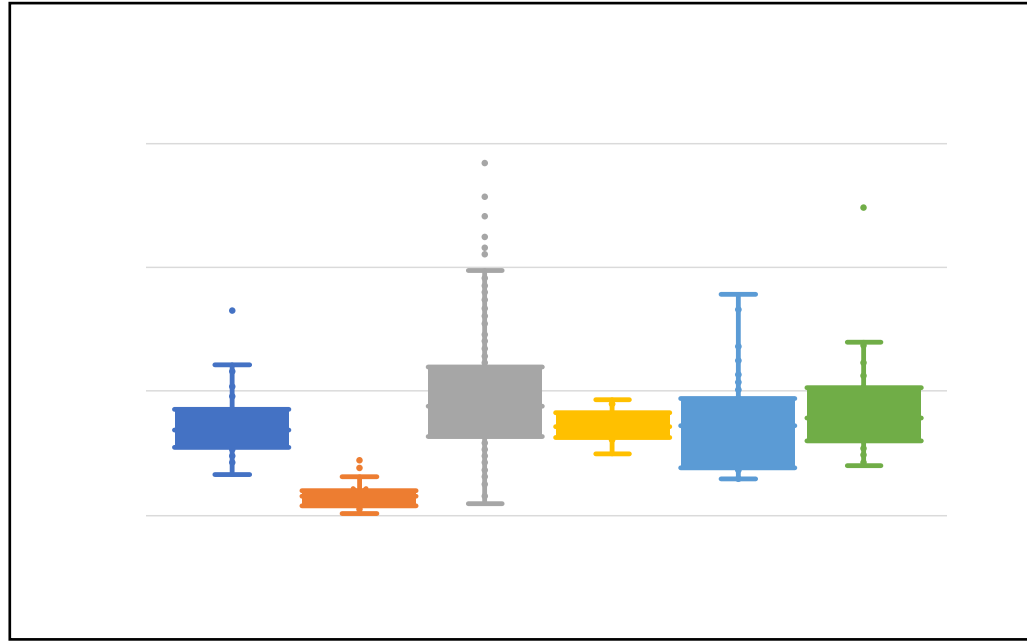

**Figure S3.** Box plots of Ka/Ks ratios calculated for each pair of orthologs within each *OR* family.
