# Supplementary material for: Evolutionary Analysis of Six Gene Families Part of the Reactive Oxygen Species (ROS) Gene Network in Three Brassicaceae Species
Source: Int J Mol Sci. 2024 Feb 5;25(3):1938. doi: 10.3390/ijms25031938 (PMC10856686; doi:10.3390/ijms25031938)
Supplement: Supplementary file 1 [file ijms-25-01938-s001.zip › Berthelier et al._Supplementary Tables.xlsx]

## Sheet: Table S1
Table S1. Distribution of APxs, Kats, CIII Prxs, DiOxs, RBOHs and SODs on the scaffolds corresponding to the two sequenced Nasturtium officinale genomes: this work (columns A-F), Kiefer et al. (2019) (columns G-H). Three populations could be distinguished in the first case, based on the presence of genes with 100% sequence identity (Pop 1, Pop 2 and Pop 3 in column F). The former N. officinale ge…
ID Redoxibase	N. officinale scaffold# (this work)	N. officinale gene#	Name RedoxiBase	AtORs#	status	NCBI_genome_Braker3 (data Kiefer et al. 2019)	Comments regarding the annotation of the former genome by Braker 3
	ptg000003	g12060.t1	NoffPrx17-1A	AtPrx17	Pop 2
18442	ptg000007	g34174.t1	NoffPrx66-1B	AtPrx66	Pop 1	Nasoff368g0218960.t1
18517	ptg000007	g34243.t1	NoffRboh03-1B	AtRboh03	Pop 1	Nasoff1819g0417230.t1
18939	ptg000007	g34241.t1	NoffFSD02-1B	AtFSD02	Pop 1	Nasoff178g0142140.t1
	ptg000008	g96364.t1	NoffPrx33-1B	AtPrx33/AtPrx34	Pop 2
18947	ptg000009	g18409.t1	NoffCSD03-1A	AtCSD03	Pop 1	Nasoff43g0054410.t1
18398	ptg000009	g18430.t1	NoffPrx57-1A	AtPrx57	Pop 1	Nasoff89g0090630.t1
18433	ptg000009	g18244.t1	NoffPrx58-1A	AtPrx58	Pop 1	Nasoff251g0175750.t1
18434	ptg000009	g18243.t1	NoffPrx59-1A	AtPrx59	Pop 1	Nasoff251g0175760.t1
18412	ptg000009	g18079.t1	NoffPrx60-1A	AtPrx60	Pop 1	Nasoff145g0124480.t1
18514	ptg000009	g17380.t1	NoffRboh04-1A	AtRboh04	Pop 1	Nasoff1105g0359870.t1
18934	ptg000009	g18009.t1	NoffFSD03-1A	AtFSD03-1A	Pop 1	Nasoff182g0144470.t1
18520	ptg000010	g30588.t1	NoffPrx[P]40-1B	AtPrx40	Pop 1	Nasoff421gxxx
18485	ptg000010	g30724.t1	NoffPrx[P]41-1B	AtPrx41	Pop 1	Nasoff1632gxxx	Manual annotation and P-GRe annotation
18404	ptg000012	g46743.t1	NoffPrx16-1A	AtPrx16	Pop 1	Nasoff111g0104810.t1
18413	ptg000012	g46957.t1	NoffPrx31-1A	AtPrx31	Pop 1	Nasoff149g0127080.t1
18388	ptg000017	g80916.t1	NoffPrx21-1A	AtPrx21	Pop 1	Nasoff29g0040370.t1
18410	ptg000017	g80795.t1	NoffPrx22-1A	AtPrx22/AtPrx23	Pop 1	Nasoff137g0120370.t1
18475	ptg000017	g80757.t1	NoffPrx22-2A	AtPrx22/AtPrx23	Pop 1	Nasoff994g0346560.t1
18409	ptg000017	g80796.t2	NoffPrx23-1A	AtPrx22/AtPrx23	Pop 1	Nasoff137g0120360.t1
18641	ptg000019		NoffAPx[P]06-1B	AtAPx06	Pop 1	Nasoff290gxxx	P-GRe annotation: only 32 amino acids present
18355	ptg000019	g41359.t1	NoffDiOx02-1B	AtDiOx02	Pop 1	Nasoff234g0168440.t1
18459	ptg000019	g40925.t1	NoffPrx11-1B	AtPrx11	Pop 1	Nasoff617g0283230.t1
18408	ptg000019	g41160.t1	NoffPrx12-1B	AtPrx12	Pop 1	Nasoff135g0118760.t1
18453	ptg000019	g41681.t1	NoffPrx13-1B	AtPrx13	Pop 1	Nasoff508g0258120.t1
	ptg000023	g96909.t1	NoffRboh06-1B	AtRboh06	Pop 2
18932	ptg000029	g48396.t1	NoffSDL01-1B	AtSDL01-1B	Pop 1	Nasoff174g0140370.t1
	ptg000029	g48397.t1	NoffSDL[P]01-1A	AtSDL01-1A	Pop 1
18480	ptg000031	g23611.t1	NoffPrx71-2A	AtPrx71	Pop 1	Nasoff1124g0361950.t1
	ptg000033	g37663.t1	NoffPrx49-1A	AtPrx49	Pop 2
17557	ptg000034	g47337.t1	NoffAPx-R01-1A	AtAPX-R	Pop 1	Nasoff4g0005710.t1	Incorrect prediction by Braker 3: manual annotation
	ptg000035	g16724.t1	NoffCSD02-1B	AtCSD02	Pop 2
17552	ptg000038	g75037.t1	NoffAPx01-1B	AtAPx01	Pop 1	Nasoff359g0215740.t1
18952	ptg000038	g75122	NoffCSD01-1B	AtCSD01	Pop 1	Nasoff907g0334770.t1
17551	ptg000039	g62137.t1	NoffAPx01-1A	AtAPx01	Pop 1	Nasoff4174g0470480.t1
18948	ptg000039	g62550	NoffCCS01-1A	AtCCS01	Pop 1	Nasoff66g0073870.t1
18955	ptg000039		NoffKat[P]01-1A	AtKat01	Pop 1	Nasoff4013gxxx	P-GRe annotation
18942	ptg000039	g63225.t1	NoffKat03-1A	AtKat03	Pop 1	Nasoff4013g0469110
18393	ptg000039	g61923.t1	NoffPrx01-1A	AtPrx01	Pop 1	Nasoff65g0072810.t1
18394	ptg000039	g61924.t1	NoffPrx02-1A	AtPrx02	Pop 1	Nasoff65g0072820.t1
18395	ptg000039	g61925.t1	NoffPrx03-1A	AtPrx03	Pop 1	Nasoff65g0072830.t1
18479	ptg000039	g62715.t1	NoffPrx05-1A	AtPrx05	Pop 1	Nasoff1082g0357370.t1
18507	ptg000039	g62239.t1	NoffRboh02-1A	AtRboh02	Pop 1	Nasoff156g0131050.t1
18505	ptg000039	g63110.t1	NoffRboh05-1A	AtRboh05	Pop 1	Nasoff15g0024080.t1
18950	ptg000039	g62221	NoffCSD01-1A	AtCSD01	Pop 1	Nasoff156g0130870.t1
18929	ptg000047	g90512.t1	NoffSDL[P]01-1A	AtSDL01	Pop 1	Nasoff50g0060630.t1
	ptg000049	g92378.t1	NoffPrx26-1A	AtPrx26	Pop 2		Incorrect prediction by Braker 3: manual annotation
	ptg000053	g7267.t1	NoffFSD03-1B	AtFSD03	Pop 2
	ptg000053	g7204.t1	NoffPrx61-1A	AtPrx61	Pop 2
18439	ptg000055	g56389.t1	NoffPrx10-1A	AtPrx10	Pop 1	Nasoff302g0196270.t1
	ptg000056	g92848.t1	NoffPrx64-1A	AtPrx64	Pop 2
18443	ptg000057	g60676.t1	NoffPrx52-1A	AtPrx52	Pop 1	Nasoff394g0227440.t1
18414	ptg000057	g60560.t1	NoffPrx53-1A	AtPrx53	Pop 1	Nasoff150g0127660.t1
18415	ptg000057	g60559.t1	NoffPrx54-1A	AtPrx54	Pop 1	Nasoff150g0127670.t1
18511	ptg000057	g60500.t1	NoffRboh01-1A	AtRboh01	Pop 1	Nasoff698g0300090.t1
18385	ptg000059	g91359.t1	NoffPrx55-1A	AtPrx55	Pop 1	Nasoff17g0026530.t1
18491	ptg000059	g91264.t1	NoffPrx56-1A	AtPrx56	Pop 1	Nasoff1266g0377460.t1
18473	ptg000061	g4113.t1	NoffPrx29-1B	AtPrx29	Pop 1	Nasoff815g0320930.t1
18930	ptg000061	g4665.t1	NoffMSD01-1A	AtMSD01	Pop 1	Nasoff79g0083390.t1
18513	ptg000062	g28443.t1	NoffRboh06-1B	AtRboh06	Pop 1	Nasoff1020g0349570.t1
18940	ptg000064	g66552.t1	NoffFSD03-1B	AtFSD03	Pop 1	Nasoff1743g0413120.t1
18489	ptg000064		NoffPrx[P]60-1B	AtPrx60	Pop 1	Nasoff132gxxx	P-GRe annotation: only 170 amino acids present + manual annotation
17563	ptg000065	g28766.t1	NoffAPx03-1A	AtAPx03	Pop 1	Nasoff4g0007060.t1
18944	ptg000065	g28775.t1	NoffKat02-1B	AtKat02	Pop 1	Nasoff78g0082680
18438	ptg000065	g28654.t1	NoffPrx48-1A	AtPrx48	Pop 1	Nasoff289g0191420.t1
18933	ptg000066	g32709.t1	NoffFSD02-1A	AtFSD02	Pop 1	Nasoff1150g0365290.t1
18450	ptg000066	g32642.t1	NoffPrx66-1A	AtPrx66	Pop 1	Nasoff483g0252090.t1
18427	ptg000066	g32042.t1	NoffPrx67-1A	AtPrx67	Pop 1	Nasoff201g0153880.t1
18515	ptg000066	g32712.t1	NoffRboh03-1A	AtRboh03	Pop 1	Nasoff1150g0365310.t1
18510	ptg000066	g31889.t1	NoffRboh08-1A	AtRboh08	Pop 1	Nasoff531g0264040.t1
	ptg000067	g57035.t1	NoffPrx11-1A	AtPrx11	Pop 2
18629	ptg000069	g95270	NoffPrx[P]47-1A	AtPrx47	Pop 1	Nasoff109gxxx	P-GRe prediction
18457	ptg000069	g95405.t1	NoffPrx07-1A	AtPrx07	Pop 1	Nasoff560g0270710.t1
18506	ptg000071	g71386.t1	NoffRboh05-1B	AtRboh05	Pop 1	Nasoff5g0007520.t1
18631	ptg000072		NoffPrx[P]26-1B	AtPrx26	Pop 1	Nasoff274gxxx	P-GRe annotation: only 53 amino acids present
	ptg000074	g76244.t1	NoffPrx64-1B	AtPrx64	Pop 2
18418	ptg000076	g2410.t1/g2412.t1	NoffPrx15-1A	AtPrx14/AtPrx15	Pop 1	Nasoff161g0133430.t1	Incorrect prediction in 2 ORFs: manual annotation
18931	ptg000078	g13110.t1	NoffFSD01-1B	AtFSD01	Pop 1	Nasoff110g0104180.t1
18429	ptg000078	g13378.t1	NoffPrx42-1B	AtPrx42	Pop 1	Nasoff222g0163150.t1
18472	ptg000078	g13031.t1	NoffPrx43-1B	AtPrx43	Pop 1	Nasoff801g0318410.t1
18471	ptg000078	g13028.t1	NoffPrx44-1B	AtPrx44-2	Pop 1	Nasoff801g0318380.t1
18519	ptg000079	g13111.t1	NoffRboh07-1B	AtRboh07	Pop 1	Nasoff110gxxx	Not predicted by Braker
	ptg000080	g63534.t1	NoffPrx25-1A	AtPrx25	Pop 2
18478	ptg000085	g26539.t1	NoffPrx39-1A	AtPrx39	Pop 1	Nasoff1062g0354790.t1
18639	ptg000085		NoffRboh[P]09-1A	AtRboh09	Pop 1	Nasoff913gxxx	P-Gre annotation: only 58 amino acids present
18336	ptg000088	g93713.t1	NoffDiOx01-1B	AtDiOx01	Pop 1	Nasoff2924g0454970.t1
18455	ptg000088	g93684.t1	NoffPrx27-1B	AtPrx27	Pop 1	Nasoff542g0266610.t1
18402	ptg000088	g93532.t1 /g93533.t1	NoffPrx28-1B	AtPrx28-1	Pop 1	Nasoff103g0100610.t1	Incorrect prediction in 2 ORFs: manual annotation
18637	ptg000092		NoffAPx[P]04-1B	AtAPx04	Pop 1	Nasoff131gxxx	P-GRe annotation: only 18 amino acids present
17550	ptg000092	g82267.t1	NoffAPx03-1B	AtAPx03	Pop 1	Nasoff78g0082590.t	Present in ptg000947 and ptg000092
18406	ptg000092	g82539.t1	NoffPrx17-2B	AtPrx17-2	Pop 1	Nasoff114g0107050.t1
18407	ptg000092	g82380.t1	NoffPrx49-1B	AtPrx49	Pop 1	Nasoff131g0116620.t1
18474	ptg000092	g82474.t1	NoffPrx50-1B	AtPrx50/AtPrx51	Pop 1	Nasoff922g0336840.t1
18941	ptg000092	g82274.t1	NoffKat02-1A	AtKat02	Pop 1	Nasoff4g0007130	Present in ptg000947 and ptg000092
17561	ptg000097	g10792.t1	NoffAPx02-1A	AtAPx02	Pop 1	not found
18396	ptg000097		NoffPrx[P]29-1A	AtPrx29	Pop 1	Nasoff72g0078530.t1	P-GRe anotation: only 54 amino acids present and manual annotation
18497	ptg000097	g11458.t1	NoffPrx17-1A	AtPrx17	Pop 1	Nasoff2242g0435970.t1
18495	ptg000097	g10164.t1	NoffPrx27-1A	AtPrx27	Pop 1	Nasoff1592g0402800.t1
18389	ptg000097	g10315.t1	NoffPrx28-1A	AtPrx28	Pop 1	Nasoff33g0044850.t1
18938	ptg000097	g10912.t1	NoffMSD01-1B	AtMSD01	Pop 1	Nasoff298g0194940.t1
18630	ptg000102		NoffPrx[P]06-1B	AtPrx06	Pop 1	Nasoff130gxxx	P-GRe annotation: only 58 amino acids present
18454	ptg000108	g38660.t1	NoffPrx65-1B	AtPrx65	Pop 1	Nasoff524g0262270.t1
	ptg000117	g17105.t1	NoffPrx10-1B	AtPrx10	Pop 2
18486	ptg000119	g40085.t1	NoffPrx[P]70-1A	AtPrx70	Pop 1	Nasoff3gxxx	Partial sequence and manual annotation
18380	ptg000119	g40086.t1	NoffPrx69-1A	AtPrx69	Pop 1	Nasoff3g0005160.t1
18379	ptg000119	g40084.t1	NoffPrx71-1A	AtPrx71	Pop 1	Nasoff3g0005140.t1
18425	ptg000119	g39785.t1	NoffPrx72-1A	AtPrx72	Pop 1	Nasoff186g0146370.t1
18461	ptg000119	g39890.t1	NoffPrx73-1A	AtPrx73	Pop 1	Nasoff655g0290960.t1
18640	ptg000119	g40455.t1	NoffRboh[P]08-1B	AtRboh08	Pop 1	Nasoff1882gxxx	Manual annotation
18510	ptg000119	g40455.t1	NoffRboh08-1A	AtRboh08	Pop 1	Nasoff531g0264040.t1
	ptg000120	g64384.t1	NoffRboh08-1A	AtRboh08	Pop 2
18508	ptg000121	g83459.t1	NoffRboh09-1B	AtRboh09	Pop 1	Nasoff301g0195800.t1
	ptg000122	g32896.t1	NoffAPx03-1A	AtAPx03	Pop 3
	ptg000122	g32905.t1	NoffKat02-1B	AtKat02	Pop 3
	ptg000122	g88745.t1	NoffRboh09-1A	AtRboh09	Pop 3
18462	ptg000127	g6602.t1	NoffPrx69-1B	AtPrx69	Pop 1	Nasoff666g0293360.t1
18463	ptg000127	g6601.t1	NoffPrx70-1B	AtPrx70	Pop 1	Nasoff666g0293370.t1
18464	ptg000127	g6600.t1	NoffPrx71-1B	AtPrx71	Pop 1	Nasoff666g0293380.t1
18430	ptg000127	g6304.t1	NoffPrx72-1B	AtPrx72	Pop 1	Nasoff238g0170160.t1
18420	ptg000127	g6405.t1	NoffPrx73-1B	AtPrx73	Pop 1	Nasoff176g0141410.t1
18476	ptg000133	g26868.t1	NoffPrx32-1A	AtPrx32	Pop 1	Nasoff1016g0349230.t1
18951	ptg000140	g9346.t1	NoffCSD03-1B	AtCSD03	Pop 1	Nasoff203g0154400.t1
18635	ptg000140		NoffPrx[P]53-1B	AtPrx53	Pop 1	Nasoff164gxxx	P-GRe annotation: only 53 amino acids present
18381	ptg000140	g8288.t1	NoffPrx52-1B	AtPrx52	Pop 1	Nasoff7g0011180.t1
18448	ptg000140	g9009.t1	NoffPrx55-1B	AtPrx55	Pop 1	Nasoff466g0247620.t1
18392	ptg000140	g9103.t1	NoffPrx56-1B	AtPrx56	Pop 1	Nasoff63g0071690.t1
18403	ptg000140	g9321.t1	NoffPrx57-1B	AtPrx57	Pop 1	Nasoff105g0101370.t1
18512	ptg000140	g8472.t1	NoffRboh01-1B	AtRboh01	Pop 1	Nasoff810g0320130.t1
18488	ptg000142		NoffPrx[P]03-1B	AtPrx03	Pop 1	Nasoff42gxxx	P-GRe annotation: only 18 amino acids present
18499	ptg000142	g42078.t1	NoffPrx01-1B	AtPrx02	Pop 1	Nasoff4280g0471420.t1
18500	ptg000142	g42079.t1	NoffPrx02-1B	AtPrx01/AtPrx02	Pop 1	Nasoff4280g0471430.t1
18957	ptg000142	g42077.t1	NoffPrx02-3B	AtPrx01	Pop 1	not found
	ptg000145	g4922.t1	NoffPrx15-1B	AtPrx14/AtPrx15	Pop 2
18422	ptg000147	g45700.t1	NoffPrx07-1B	AtPrx07	Pop 1	Nasoff155g0130570.t1
18419	ptg000148	g19340.t1	NoffPrx15-1B	AtPrx14/AtPrx15	Pop 1	Nasoff167g0136590.t1
18509	ptg000151	g18921.t1	NoffRboh06-1A	AtRboh06	Pop 1	Nasoff479g0250970.t1
	ptg000152	g44434.t1	NoffMSD01-1B	AtMSD01	Pop 2
	ptg000157	g73385.t1	NoffPrx41-1A	AtPrx41	Pop 2
	ptg000169	g7320.t1	NoffPrx[P]13-1B	AtPrx13	Pop 2		Partial sequence: manual annotation
	ptg000172	g55856	NoffPrx[P]47-1A	AtPrx47	Pop 2
18447	ptg000173	g24799.t1	NoffPrx40-1A	AtPrx40	Pop 1	Nasoff449g0242880.t1
18483	ptg000173	g24935.t1	NoffPrx41-1A	AtPrx41	Pop 1	Nasoff1202g0370860.t1
18633	ptg000174		NoffPrx[P]34-1A	AtPrx34	Pop 1	Nasoff125gxxx	P-GRe annotation: only 39 amino acids present
18634	ptg000174		NoffPrx[P]35-1A	AtPrx35	Pop 1	Nasoff125gxxx	P-GRe annotation: only 49 amino acids present
	ptg000179	g3063.t1	NoffPrx62-1B	AtPrx62	Pop 2
18636	ptg000185		NoffPrx[P]20-1A	AtPrx20	Pop 1	Nasoff58gxxx	Partial sequence: manual annotation
18466	ptg000185	g42929.t1	NoffPrx19-1A	AtPrx19	Pop 1	Nasoff736g0307150.t1
18451	ptg000186	g70492.t1	NoffPrx30-1A	AtPrx30	Pop 1	Nasoff507g0257770.t1
18382	ptg000188	g47753.t1	NoffPrx06-1A	AtPrx06	Pop 1	Nasoff10g0015660.t1
	ptg000193	g15839.t1	NoffPrx57-1B	AtPrx58	Pop 2
	ptg000193	g15838.t1	NoffPrx58-1A	AtPrx59	Pop 2
18943	ptg000199	g47196.t1	NoffKat01-1B	AtKat01	Pop 1	Nasoff5g0008630
18945	ptg000199	g47195.t1	NoffKat03-1B	AtKat03	Pop 1	Nasoff5g0008620
18498	ptg000207	g68945.t1	NoffPrx64-1B	AtPrx64	Pop 1	Nasoff3429g0463230.t1
18421	ptg000211	g91190.t1	NoffPrx43-1A	AtPrx43	Pop 1	Nasoff181g0143990.t1
18423	ptg000211	g91187.t1	NoffPrx44-1A	AtPrx44-2	Pop 1	Nasoff181g0144020.t1
18424	ptg000211	g91186.t1	NoffPrx44-2A	AtPrx44-1	Pop 1	Nasoff181g0144030.t1
18386	ptg000211	g90812.t1	NoffPrx45-1A	AtPrx45	Pop 1	Nasoff25g0036610.t1
18445	ptg000217	g81028.t1	NoffPrx65-1A	AtPrx65	Pop 1	Nasoff426g0236600.t1
	ptg000223	g50213.t1	NoffPrx12	AtPrx12	Pop 2
18426	ptg000225	g97652.t1	NoffPrx42-1A	AtPrx42	Pop 1	Nasoff192g0149250.t1
	ptg000231	g2102.t1	NoffSDL[P]01-1A	AtSDL01	Pop 2
	ptg000231	g2101.t1	NoffSDL01-1B	AtSDL01	Pop 2
	ptg000238	g71635.t1	NoffPrx31-1A	AtPrx31	Pop 2
	ptg000243	g84714.t1	NoffPrx07-1A	AtPrx07	Pop 2		Only partial sequence found
	ptg000256	g65737.t1	NoffPrx32-1A	AtPrx32	Pop 2		Only partial sequence found
17558	ptg000257	g99684.t1	NoffAPx-R01-1B	AtAPX-R	Pop 1	Nasoff22g0033090.t1
18436	ptg000257	g99490.t1	NoffPrx45-1B	AtPrx45	Pop 1	Nasoff262g0180700.t1
18441	ptg000257	g99632.t1	NoffPrx46-1B	AtPrx46	Pop 1	Nasoff355g0214510.t1
18493	ptg000259		NoffPrx31-1B	AtPrx31	Pop 1	Nasoff1345g0385090.t1
18481	ptg000262	g42613.t1	NoffPrx18-1B	AtPrx18	Pop 1	Nasoff1177g0368120.t1
	ptg000283	g80495.t1	NoffAPx05-1A	AtAPx05	Pop 2
	ptg000283	g80530.t1	NoffPrx37-1A	AtPrx37/AtPrx38	Pop 2
18437	ptg000292	g82109.t1	NoffPrx17-1B	AtPrx17-1	Pop 1	Nasoff278g0186930.t1
	ptg000301	g76902.t1	NoffAPx04-1A	AtAPx04	Pop 2
	ptg000302	g82903.t1	NoffFSD02-1B	AtFSD02	Pop 2
	ptg000302	g82974.t1	NoffPrx66-1A	AtPrx66	Pop 2
	ptg000302	g82901.t1	NoffRboh03-1B	AtRboh03	Pop 2
17559	ptg000305	g68501.t1	NoffAPx06-1A	AtAPx06	Pop 1	Nasoff171g0138570.t1
18356	ptg000305	g68177.t1	NoffDiOx02-1A	AtDiOx02	Pop 1	Nasoff490g0253830.t1
18487	ptg000305	g92649.t1	NoffPrx[P]13-1A	AtPrx13 5' short	Pop 1	Nasoff1277gxxx	P-GRe annotation: only 46 amino acids present and manual annotation
18390	ptg000305	g67751.t1	NoffPrx11-1A	AtPrx11	Pop 1	Nasoff44g0055320.t1
18387	ptg000305	g67992.t1	NoffPrx12-1A	AtPrx12	Pop 1	Nasoff28g0039820.t1
18456	ptg000314	g18578.t1	NoffPrx59-1B	AtPrx59	Pop 1	Nasoff544g0267100.t1
	ptg000315	g31396.t1	NoffPrx62-1B	AtPrx62	Pop 2
	ptg000326	g50886.t1/g50888.t1	NoffPrx15-1A	AtPrx14/AtPrx15	Pop 2		Incorrect prediction in 2 ORFs: manual annotation
18953	ptg000330	g46089.t1	NoffCSD02-1A	AtCSD02	Pop 1	Nasoff2579g0446520.t1
18642	ptg000330		NoffRboh[P]07-1A	AtRboh07	Pop 1	not found	Manual annotation
	ptg000337	g47543.t1	NoffPrx20-1B	AtPrx20	Pop 2
	ptg000350	g2975.t1	NoffPrx39-1A	AtPrx39	Pop 2
	ptg000365	g50099.t1	NoffRboh04-1B	AtRboh04	Pop 2
17554	ptg000371	g78072.t1	NoffAPx05-1A	AtAPx05	Pop 1	Nasoff1961g0424870.t1
18516	ptg000375	g66017.t1	NoffRboh10-1A	AtRboh10	Pop 1	Nasoff1394g0389090.t1
	ptg000377	g66169.t1	NoffPrx18-1A	AtPrx18	Pop 2
	ptg000379	g86423.t1	NoffRboh10-1A	AtRboh10	Pop 2
	ptg000380	g81297.t1	NoffPrx09-1B	AtPrx09	Pop 2
	ptg000390	g26679.t1	NoffPrx25-1B	AtPrx25	Pop 2
17568	ptg000391	g58770.t1	NoffAPx04-1A	AtAPx04	Pop 1	Nasoff420g0234960.t1	Incorrect prediction by Braker 3: manual annotation
18384	ptg000391	g58742.t1	NoffPrx49-1A	AtPrx49	Pop 1	Nasoff12g0018710.t1
18383	ptg000391	g58652.t1	NoffPrx50-1A	AtPrx50/AtPrx51	Pop 1	Nasoff12g0019610.t1
18632	ptg000420		NoffPrx[P]34-1B	AtPrx34	Pop 1	Nasoff579gxxx	P-GRe annotation: only 56 amino acids present
18400	ptg000420	g35237.t1	NoffPrx33-1A	AtPrx33/AtPrx34	Pop 1	Nasoff95g0094830.t1
18946	ptg000421	g48238	NoffCCS01-1B	AtCCS01	Pop 1	Nasoff24g0034800.t1
	ptg000423	g55376	NoffCSD01-1B	AtCSD01	Pop 2	Nasoff907g0334770.t1
18949	ptg000431	g47853.t1	NoffCSD02-1B	AtCSD02	Pop 1	Nasoff126g0113740.t1
	ptg000432	g88755.t1	NoffPrx39-1B	AtPrx39	Pop 2
	ptg000437	g32799.t1	NoffAPx06-1A	AtAPx06	Pop 2
18638	ptg000438		NoffRboh[P]10-1B	AtRboh10	Pop 1	Nasoff362gxxx	P-GRe annotation: only 23 amino acids present
18482	ptg000457	g25247.t1	NoffPrx20-1B	AtPrx20	Pop 1	Nasoff1190g0369560.t1
18494	ptg000464	g83469.t1	NoffPrx39-1B	AtPrx39	Pop 1	Nasoff1469g0394690.t1
18452	ptg000474	g61316.t1	NoffPrx09-1B	AtPrx09	Pop 1	Nasoff491g0254000.t1
18440	ptg000474	g61510.t1	NoffPrx10-1B	AtPrx10	Pop 1	Nasoff321g0203380.t1
	ptg000475	g25366.t1	NoffPrx18-1B	AtPrx18	Pop 2
	ptg000477	g59305.t1	NoffAPx-R01-1A	AtAPX-R	Pop 2
18435	ptg000478	g87954.t1	NoffPrx35-1B	AtPrx35	Pop 1	Nasoff261g0180220.t1
18391	ptg000478	g88041.t1	NoffPrx36-1B	AtPrx36	Pop 1	Nasoff55g0065320.t1
18490	ptg000479		NoffPrx[P]19-1B	AtPrx19	Pop 1	Nasoff97gxxx
18460	ptg000479	g3788.t1	NoffPrx21-1B	AtPrx21	Pop 1	Nasoff633g0286410.t1
18431	ptg000479	g3629.t1	NoffPrx22-2B	AtPrx22/AtPrx23	Pop 1	Nasoff244g0173150.t1
	ptg000499	g7787.t1	NoffFSD01-1B	AtFSD01	Pop 2
	ptg000499	g7786.t1	NoffRboh07-1B	AtRboh07	Pop 2		Not predicted by Braker 3
	ptg000499	g7867.t1	NoffPrx43-1B	AtPrx43	Pop 2
	ptg000499	g7870.t1	NoffPrx44-1B	AtPrx44	Pop 2
	ptg000506	g5859.t1	NoffPrx56-1A	AtPrx56	Pop 2
17569	ptg000513	g91820.t1	NoffAPx07-1B	AtAPrx07-1B	Pop 1	Nasoff248g0174480.t1
18432	ptg000513	g91848.t1	NoffPrx37-1B	AtPrx37/AtPrx38	Pop 1	Nasoff248g0174690.t1
	ptg000536	g64951.t1	NoffPrx64-1A	AtPrx64	Pop 2
	ptg000543	g25104.t1	NoffAPx03-1A	AtAPx03	Pop 2
	ptg000543	g25097.t1	NoffKat02-1A	AtKat02	Pop 2
	ptg000545	g82795.t1	NoffAPx07-1A	AtAPx07	Pop 2
	ptg000545	g82826.t1	NoffPrx37-1A	AtPrx37/AtPrx38	Pop 2
	ptg000545	g82835.t1	NoffPrx38-1A	AtPrx37/AtPrx38	Pop 2
	ptg000605	g12719.t1	NoffPrx45-1A	AtPrx45	Pop 2
	ptg000615	g48745.t1	NoffRboh02-1A	AtRboh02	Pop 2
	ptg000615	g48763	NoffCSD01-1A	AtCSD01	Pop 2
	ptg000650	g4789.t1	NoffPrx[P]13-1B	AtPrx13	Pop 3		Partial sequence
	ptg000667	g96040.t1	NoffFSD03-1A	AtFSD03	Pop 2
17567	ptg000674	g44997.t1	NoffAPx07-1A	AtAPx07	Pop 1	Nasoff1342g0384750.t1
18496	ptg000674	g44966.t1	NoffPrx37-1A	AtPrx37/AtPrx38	Pop 1	Nasoff1810g0416730.t1
18444	ptg000674	g44954.t1	NoffPrx38-1A	AtPrx37/AtPrx38	Pop 1	Nasoff422g0235690.t1
	ptg000695	g5539.t1	NoffPrx07-1A	AtPrx07	Pop 3
18484	ptg000702	g20767.t1	NoffPrx61-1A	AtPrx61	Pop 1	Nasoff1209g0371770.t1
	ptg000704	g94284.t1	NoffPrx37-1B	AtPrx37/AtPrx38	Pop 2
18928	ptg000707	g52515.t1	NoffFSD01-1A	AtFSD01	Pop 1	Nasoff41g0052810.t1
	ptg000740	g59768.t1	NoffAPx01-1A	AtAPx01	Pop 2
	ptg000753	g87529.t1	NoffPrx01/NoffPrx02-1A	AtPrx01/AtPrx02	Pop 2
	ptg000753	g87527.t1	NoffPrx01-1A	AtPrx01	Pop 2
	ptg000753	g87528.t1	NoffPrx02-1A	AtPrx02	Pop 2
18428	ptg000760	g20928.t1	NoffPrx64-1A	AtPrx64	Pop 1	Nasoff215g0159560.t1
	ptg000768	g37542.t1	NoffPrx32-1A	AtPrx32	Pop 3		Partial sequence
	ptg000839	g71307.t1	NoffMSD01-1A	AtMSD01	Pop 2
18477	ptg000887	g23480.t1	NoffPrx25-1B	AtPrx25	Pop 1	Nasoff1037g0351790.t1
18518	ptg000913	g2273.t1	NoffRboh04-1B	AtRboh04	Pop 1	Nasoff1845g0418800.t1
18449	ptg000929	g37706.t1	NoffPrx62-1A	AtPrx62	Pop 1	Nasoff473g0249540.t1
17550	ptg000947	g98051.t1	NoffAPx03-1B	AtAPx03	Pop 1	Nasoff78g0082590.t1	Present in ptg000947 and ptg000092
18941	ptg000947	g98044.t1	NoffKat02-1A	AtKat02	Pop 1	Nasoff4g0007130	Present in ptg000947 and ptg000092
18465	ptg000947	g98208.t1	NoffPrx47-1B	AtPrx47	Pop 1	Nasoff671g0294350.t1
18411	ptg000947	g98167.t1	NoffPrx48-1B	AtPrx48	Pop 1	Nasoff144g0123890.t1
	ptg000990	g728.t1	NoffPrx65-1B	AtPrx65	Pop 2
18458	ptg001012	g56136.t1	NoffPrx33-1B	AtPrx33/AtPrx34	Pop 1	Nasoff579g0274890.t1
	ptg001018	g78155.t1	NoffPrx35-1B	AtPrx35	Pop 2
	ptg001035	g78427.t1	NoffDiOx01-1A	AtDiOx01	Pop 2
	ptg001035	g78457.t1	NoffPrx27-1A	AtPrx27	Pop 2
18467	ptg001113	g70122.t1	NoffPrx18-1A	AtPrx18	Pop 1	Nasoff741g0308270.t1
	ptg001123	g39072.t1	NoffPrx[P]70-1B	AtPrx70	Pop 2
	ptg001123	g39071.t1	NoffPrx69-1A	AtPrx69	Pop 2
	ptg001123	g39073.t1	NoffPrx71-1A	AtPrx71	Pop 2
18468	ptg001137	g93120.t1	NoffPrx04-1B	AtPrx04	Pop 1	Nasoff785g0315760.t1
18469	ptg001137	g93119.t1	NoffPrx05-1B	AtPrx05	Pop 1	Nasoff785g0315770.t1
	ptg001145	g81818.t1	NoffPrx27-1A	AtPrx27	Pop 3
	ptg001199	g44781	NoffCSD01-1A	AtCSD01	Pop 3
	ptg001280	g99194.t1	NoffPrx30-1A	AtPrx30	Pop 2
	ptg001338	g88301.t1	NoffPrx69-1B	AtPrx69	Pop 2
	ptg001338	g88302.t1	NoffPrx70-1B	AtPrx70	Pop 2
	ptg001338	g88303.t1	NoffPrx71-1B	AtPrx71	Pop 2
18397	ptg001339	g48585.t1	NoffPrx26-1A	AtPrx26	Pop 1	Nasoff73g0079740.t1
	ptg001352	g84535.t1	NoffPrx07-1B	AtPrx07	Pop 2
	ptg001419	g12663.t1	NoffPrx18-1B	AtPrx18	Pop 3
	ptg001502	g50549.t1	NoffPrx09-1A	AtPrx09	Pop 2
18470	ptg001507		NoffPrx44-2B	AtPrx44	Pop 1	Nasoff801g0318370.t1
	ptg001635	g69778.t1	NoffPrx21-1B	AtPrx21	Pop 2
	ptg001744	g52426.t1	NoffSDL[P]01-1A	AtSDL01	Pop 2
18401	ptg001885	g72453.t1	NoffPrx[P]28-1A	AtPrx28	Pop 1	Nasoff103g0100600.t1
	ptg001930	g4740.t1	NoffPrx48-1B	AtPrx48	Pop 2
18492	ptg002265	g15467.t1	NoffPrx62-1B	AtPrx62	Pop 1	Nasoff1330g0383750.t1
18446	ptg002489	g38546.t1	NoffPrx25-1A	AtPrx25	Pop 1	Nasoff430g0237790.t1
	ptg002565	g6883.t1	NoffAPx03-1B	AtAPx03	Pop 2
				AtPrx08	not found		No ortholog found in both N. officinale genomes
				AtPrx24	not found		No ortholog found in both N. officinale genomes
				AtPrx63	not found		No ortholog found in both N. officinale genomes
				AtPrx68	not found		No ortholog found in both N. officinale genomes

## Sheet: Table S2
	Table S2. Isoforms of APxs, Kats, CIII Prxs, DiOxs, RBOHs and SODs encoded by orthologs and ohnologs ORs found in the three Brassicaceae species annotated from various database sources. Gains, losses or pseudogenizations of the different orthologs are detailed for each family. The percentage of identity between orthologs and ohnologs protein sequences has been determined with an alignment matrix.…
	Class III peroxidases (Prxs)							Ascorbate peroxidases (APxs)
	E . salsugineum / T. salsuginea	% identity orthologs	A. thaliana	% identity orthologs	N. officinale	% identity ohnologs		E . salsugineum / T. salsuginea	% identity orthologs	A. thaliana	% identity orthologs	N. officinale	% identity ohnologs
	TsPrx01 /Thhalv10008202m	73	AtPrx01/At1g05240	72	NoffPrx01-1A /Nasoffncbi65g0072840			TsAPx-R /Thhalv10025686m	85	AtAPx-R/At4g32320	81	NoffAPx-R01-1A /Nasoffncbi4g0005770
				73	NoffPrx01-1B /Nasoffncbi4280g0475610	90.06					82	NoffAPx-R01-1B /Nasoffncbi22g0033160	89
	TsPrx02 /Thhalv10008157m	73	AtPrx02/At1g05250	75	NoffPrx02-1A /Nasoffncbi65g0072850			TsAPx01 /Thhalv10008402m	94	AtAPx01/At1g07890	91	NoffAPx01-1B /Nasoffncbi359g0216440
				73	NoffPrx02-1B /Nasoffncbi4280g0475620	92					91	NoffAPx01-1A /Nasoffncbi4174g0474690	98
				73	NoffPrx02-2B /	100		TsAPx02 /Thhalv10021381m	95	AtAPx02/At3g09640	92	NoffAPx02-1A /Nasoffncbi90g0091400
	TsPrx03 /Thhalv10008189m	92	AtPrx03/At1g05260	93	NoffPrx03-1A /Nasoffncbi65g0072860							lost
				83	NoffPrx[P]03-1B /Nasoffncbi42gxxx	83		TsAPx03-1A /Thhalv10025911m	93	AtAPx03/At4g35000	92	NoffAPx03-1B /Nasoffncbi78g0082690
	TsPrx04-1 /Thhalv10008244m	91	AtPrx04/At1g14540	86	NoffPrx04-1B /Nasoffncbi785g0317200			TsAPx03-1B /Thhalv10023023m	78		92	NoffAPx03-1A /Nasoffncbi4g0007120	96
	TsPrx04-2 /Thhalv10023814m	91			lost			TsAPx03-1C /Thhalv10022797m	86
	TsPrx[P]05	82	AtPrx05/At1g14550	87	NoffPrx05-1B /Nasoffncbi785g0317210			TsAPx04 /Thhalv10025942m	91	AtAPx04/At4g35970	93	NoffAPx04-1A /Nasoffncbi420g0235880
				89	NoffPrx05-1A /Nasoffncbi1082g0359160	94.98					77	NoffAPx[P]04-1B /Nasoff131gxxx	79
	TsPrx06 /Thhalv10009658m	88	AtPrx06/At1g24110	87	NoffPrx06-1A /Nasoffncbi10g0015740			TsAPx05 /Thhalv10028759m	88	AtAPx05/At4g08390	91	NoffAPx05-1A /Nasoffncbi1961g0427430
				58	NoffPrx[P]06-1B /Nasoff130gxxx	72.41						lost
	TsPrx07 /Thhalv10008077m	82	AtPrx07/At1g30870	84	NoffPrx07-1A /Nasoffncbi560g0271690			TsAPx06 /Thhalv10018581m	84	AtAPx06/At1g77490	88	NoffAPx06-1A /Nasoffncbi171g0138980
				85	NoffPrx07-1B /Nasoffncbi155g0130990	93.98					68	NoffAPx[P]06-1B /Nasoff290gxxx	75
	ns		AtPrx08/At1g34510		ns			TsAPx07 /Thhalv10028741m	87	AtAPx07/At4g09010	90	NoffAPx07-1A /Nasoffncbi1342g0386680
			AtPrx[P]08		ns						90	NoffAPx07-1B?	94
	TsPrx09 /Thhalv10011616m	88	AtPrx09/At1g44970	93	NoffPrx09-1B /Nasoffncbi491g0254940					AtAPx[P]08
					lost			10		8+1 Ψ		12 + 3 Ψ
	TsPrx10 /Thhalv10011619m	89	AtPrx10/At1g49570	90	NoffPrx10-1A /Nasoffncbi302g0196810
				91	NoffPrx10-1B /Nasoffncbi321g0203970	95.14		a-Dioxygenases (DiOxs)
	TsPrx11 /Thhalv10018830m	94	AtPrx11/At1g68850	92	NoffPrx11-1A /Nasoffncbi44g0055380			E . salsugineum / T. salsuginea	% identity orthologs	Arabidopsis thaliana	% identity orthologs	N. officinale	% identity ohnologs
				93	NoffPrx11-1B /Nasoffncbi617g0284390	95.82		TsDiOx01 /Thhalv10020279	85	AtDiOx01/At3g01420	87	NoffDiOx01-1B /Nasoffncbi2924g0458510
	TsPrx12 /Thhalv10018753m	90	AtPrx12/At1g71695	90	NoffPrx12-1A /Nasoffncbi28g0039870							lost
				90	NoffPrx12-1B /Nasoffncbi135g0119150	96.94		TsDiOx02 /Thhalv10018266	91	AtDiOx02/At1g73680	91	NoffDiOx02-1B /Nasoffncbi234g0168830
	TsPrx13 /Thhalv10019514m	81	AtPrx13/At1g77100	86	NoffPrx13-1B /Nasoffncbi508g0258980						92	NoffDiOx02-1A / Nasoffncbi490g0254770	96
	TsPrx[P]13 /Thhalv10019729m	58		76	NoffPrx[P]13-1A /Nasoffncbi1277gxxx	80.43		2		2		3
	ns		AtPrx14/At2g18140		ns
					ns			NADPH oxidases / Respiratory Burst Oxidase Homologs (Rbohs)
	TsPrx15 /Thhalv10022774m	90	AtPrx15/At2g18150	90	NoffPrx15-1A /Nasoffncbi161g0133840			E . salsugineum / T. salsuginea	% identity orthologs	Arabidopsis thaliana	% identity orthologs	N. officinale	% identity ohnologs
				90	NoffPrx15-1B /Nasoffncbi167g0137030	95.22		TsRboh01 /Thhalv10012617	83	AtRboh01 /At5g07390	84	NoffRboh01-1A /Nasoff698g0300090
	ns		AtPrx16/At2g18980	88	NoffPrx16-1A /Nasoffncbi111g0105050						85	NoffRboh01-1B /Nasoff810g0320130	94
					lost			TsRboh02 /Thhalv10006793	87	AtRboh02/At1g09090	90	NoffRboh02-1A /Nasoff156g0131050
	TsPrx17 /Thhalv10000239m	91	AtPrx17/At2g22420	91	NoffPrx17-1A /Nasoffncbi2242g0439050							lost
	TsPrx[P]17-1 /Thhalv10000442m	79		91	NoffPrx17-1B /Nasoffncbi278g0187350	95.73		TsRboh03 /Thhalv10012613	92	AtRboh03/At5g51060	90	NoffRboh03-1A /Nasoff1150g0365310
	TsPrx[P]17-2 /Thhalv10026826m	73		78	NoffPrx17-2B /Nasoffncbi114g0107310	74.22					92	NoffRboh03-1B /Nasoff1819g0417230	95
	TsPrx18 /Thhalv10000495m	88	AtPrx18/At2g24800	90	NoffPrx18-1A /Nasoffncbi741g0309540			TsRboh04 /Thhalv10003619	91	AtRboh04/At5g47910	92	NoffRboh04-1A /Nasoff1105g0359870
				89	NoffPrx18-1B /Nasoffncbi1177g0369950	95.41					93	NoffRboh04-1B /Nasoff1845g0418800	96
	TsPrx19 /Thhalv10016874m	85	AtPrx19/At2g34060	87	NoffPrx19-1A /Nasoffncbi736g0308390			TsRboh05 /Thhalv10006725	90	AtRboh05/At1g19230	90	NoffRboh05-1A /Nasoff15g0024080
				86	NoffPrx[P]19-1B /Nasoffncbi97gxxx	87.37					90	NoffRboh05-1B /Nasoff5g0007520	93
	TsPrx20 / Thhalv10016900m	88	AtPrx20/At2g35380	90	NoffPrx20-1B /Nasoffncbi1190g0371410			TsRboh06 /Thhalv10023240	93	AtRboh06/At1g64060	92	NoffRboh06-1A /Nasoff479g0250970
				54	NoffPrx[P]20-2A /Nasoff58gxxx	81.73					92	NoffRboh06-1B /Nasoff1020g0349570	97
	TsPrx21 /Thhalv10016921m	95	AtPrx21/At2g37130	94	NoffPrx21-1A /Nasoffncbi29g0040430			TsRboh07-1 /Thhalv10024427	77	AtRboh07/At4g25090	82	NoffRboh07-1B /Nasoff110gxxx
				94	NoffPrx21-1B /Nasoffncbi633g0287610	98.77		TsRboh07-2 /Thhalv10024426	79			NoffRboh[P]07-1A	57
	lost		AtPrx22/At2g38380	78	NoffPrx22-1A /Nasoffncbi137g0120760			TsRboh08 /Thhalv10016055	94	AtRboh08/At5g60010	94	NoffRboh08-1A /Nasoff531g0264040
				88	NoffPrx22-2A /Nasoffncbi994g0348200	85.1						NoffRboh[P]08-1B /Nasoff1882gxxx	96
				90	NoffPrx22-2B /Nasoffncbi244g0173560	87.39		TsRboh09 /Thhalv10028400m	82	AtRboh09/At4g11230	82	NoffRboh[P]09-1A /Nasoff913gxxx
	TsPrx23 /Thhalv10016868m	85	AtPrx23/At2g38390	82	NoffPrx23-1A /Nasoffncbi137g0120750							NoffRboh09-1B /Nasoff301g0195800	94
					lost			TsRboh10 /Thhalv10003051	87	AtRboh10/At3g45810	86	NoffRboh10-1A /Nasoff1394g0389090
	TsPrx24 /Thhalv10016858m	85	AtPrx24/At2g39040		lost							NoffRboh[P]10-1B /Nasoff362gxxx	82
					lost			11		10		15 + 4 Ψ
	TsPrx25 /Thhalv10016924m	92	AtPrx25/At2g41480	93	NoffPrx25-1A /Nasoffncbi430g0238690
				93	NoffPrx25-1B /Nasoffncbi1037g0353580	96.93		Catalases (Kats)
	TsPrx26 /Thhalv10001541m	88	AtPrx26/At2g43480	78	NoffPrx26-1A /Nasoffncbi73g0079800			E . salsugineum / T. salsuginea	% identity orthologs	Arabidopsis thaliana	% identity orthologs	N. officinale	% identity ohnologs
				73	NoffPrx[P]26-1B /Nasoff274gxxx	60		TsKat01/ Thhalv10007472	95	AtKat01/At1g20630	94	NoffKat01-1B/Nasoff5g0008630
	TsPrx27 /Thhalv10021152m	88	AtPrx27/At3g01190	86	NoffPrx27-1B /Nasoffncbi542g0267490						73	NoffKat[P]01-1A/Nasoff4013gxxx	79
				87	NoffPrx27-1A /Nasoffncbi1592g0405290	95.95		TsKat02/Thhalv10025015	98	AtKat02/At4g35090	98	NoffKat02-1A/Nasoff4g0007130
	TsPrx28 /Thhalv10021155m	80	AtPrx28/At3g03670	76	NoffPrx28-1A /Nasoffncbi33g0044950						97	NoffKat02-1B/Nasoff78g0082680	98
				77	NoffPrx28-1B /Nasoffncbi103g0100830	78.48		TsKat03/Thhalv10007795	99	AtKat03 /At1g20620	99	NoffKat03-1A/Nasoff4013g0469110
				51/53 AtPrx28	NoffPrx[P]28-2B /Nasoffncbi103g0100820	54.78		TsKat[P]04	92		98	NoffKat03-1B/Nasoff5g0008620	99
	TsPrx29 /Thhalv10021081m	86	AtPrx29/At3g17070	86	NoffPrx29-1B /Nasoffncbi815g0322460			3 + 1 Ψ		3		5
			AtPrx[P]29/At3g42570	83	NoffPrx[P]29-1A /Nasoffncbi72g0078620	90
	TsPrx30 /Thhalv10021123m	93	AtPrx30/At3g21770	90	NoffPrx30-1A /Nasoffncbi507g0258640			Superoxide dismutases (CSDs, FSDs, MSDs,CCS)
					lost			E . salsugineum / T. salsuginea	% identity orthologs	Arabidopsis thaliana	% identity orthologs	N. officinale	% identity ohnologs
	TsPrx31 /Thhalv10004596m	89	AtPrx31/At3g28200	88	NoffPrx31-1A /Nasoffncbi149g0127530			TsCSD01/Thhalv10008927	94	AtCSD01/At1g08830	92	NoffCSD01-1A/Nasoff156g0130870
				87	NoffPrx31-1B /Nasoffncbi1345g0387030	94.36					91	NoffCSD01-1B/Nasoff907g0334770	94
	TsPrx32 /Thhalv10022759m	91	AtPrx32/At3g32980	92	NoffPrx32-1A /Nasoffncbi1016g0350950			TsCSD02/Thhalv10017094	85	AtCSD02/At2g28190	83	NoffCSD02-1A/Nasoff126g0113740
					lost						84	NoffCSD02-1B/Nasoff2579g0446520	88
	lost		AtPrx33/At3g49110	88/89 AtPrx34	NoffPrx33-1A /Nasoffncbi95g0095010			TsCSD03/Thhalv10014873	90	AtCSD03/At5g18100	90	NoffCSD03-1A/Nasoff43g0054410
				88/89 AtPrx34	NoffPrx33-1B /Nasoffncbi579g0275960	96.88					92	NoffCSD03-1B/Nasoff203g0154400	96
	TsPrx34 /Thhalv10010494m	92	AtPrx34/At3g49120	43	NoffPrx[P]34-1A /Nasoff125gxxx	48		TsFSD01-1A/Thhalv10026218	93	AtFSD01/At4g25100	93	NoffFSD01-1A/Nasoff41g0052810
				83	NoffPrx[P]34-1B /Nasoff579gxxx	79					94	NoffFSD01-1B/Nasoff110g0104180	98
	TsPrx35 /Thhalv10010538m	88	AtPrx35/At3g49960	87	NoffPrx35-1B /Nasoffncbi261g0180610			TsFSD02/Thhalv10014192	88	AtFSD02/At5g51100	90	NoffFSD02-1A/Nasoff1150g0365290
				82	NoffPrx[P]35-1A /Nasoff125gxxx	85.71					89	NoffFSD02-1B/Nasoff178g0142140	95
	TsPrx36 /Thhalv10011077m	79	AtPrx36/At3g50990	82	NoffPrx36-1B /Nasoffncbi55g0065330			TsFSD03/Thhalv10004781	93	AtFSD03/At5g23310	92	NoffFSD03-1A/Nasoff182g0144470
					lost						91	NoffFSD03-1B/Nasoff1743g0413120	94
	TsPrx37 /Thhalv10028769m	86	AtPrx37/At4g08770	89	NoffPrx37-1A /Nasoffncbi1810g0419250			TsMSD01-1A/Thhalv10021449	92	AtMSD01/At3g10920	93	NoffMSD01-1A/Nasoff79g0083390
				90	NoffPrx37-1B /Nasoffncbi248g0175090	91.17					94	NoffMSD01-1B/Nasoff298g0194940	94
	lost		AtPrx38/At4g08780	88/91 P37	NoffPrx38-1A /Nasoffncbi422g0236610	94.81		TsSDL01/Thhalv10006477	91	AtSDL01/At3g56350	85	NoffSDL[P]01-1A/Nasoff50g0060630
					lost						92	NoffSDL01-1B/Nasoff174g0140370	90
	TsPrx39 /Thhalv10028797m	87	AtPrx39/At4g11290	88	NoffPrx39-1A /Nasoffncbi1062g0356610			TsCCS01/Thhalv10008232	88	AtCCS01/At1g12520	91	NoffCCS01-1B/Nasoff24g0034800
				89	NoffPrx39-1B /Nasoffncbi1469g0396860	95.73					89	NoffCCS01-1A/Nasoff66g0073870	93
	TsPrx40 /Thhalv10025534m	88	AtPrx40/At4g16270	90	NoffPrx40-1A /Nasoffncbi449g0243830			9		9		17 + 1 Ψ
				77	NoffPrx[P]40-1B /Nasoff421gxxx	82
	TsPrx41 /Thhalv10025673m	86	AtPrx41/At4g17690	86	NoffPrx41-1A /Nasoffncbi1202g0372760
				80	NoffPrx[P]41-1B /Nasoffncbi1632gxxx	85
	TsPrx42 /Thhalv10025680m	97	AtPrx42/At4g21960	97	NoffPrx42-1A /Nasoffncbi192g0149620
				97	NoffPrx42-1B /Nasoffncbi222g0163540	98.18
	TsPrx43 /Thhalv10025604m	88	AtPrx43/At4g25980	88	NoffPrx43-1A /Nasoffncbi181g0144370
				88	NoffPrx43-1B /Nasoffncbi801g0319850	94.48
	TsPrx44 /Thhalv10025781m	87	AtPrx44/At4g26010	81	NoffPrx44-1A /Nasoffncbi181g0144400
	TsPrx[P]44 /Thhalv10026803m	80		82	NoffPrx44-1B /Nasoffncbi801g0319820	89.74
				86	NoffPrx44-2A /Nasoffncbi181g0144410	86.05
				87	NoffPrx44-2B /Nasoffncbi801g0319810	87.5
	TsPrx45 /Thhalv10025699m	89	AtPrx45/At4g30170	87	NoffPrx45-1A /Nasoffncbi25g0036690
				89	NoffPrx45-1B /Nasoffncbi262g0181090	94.77
	TsPrx46 /Thhalv10025685m	88	AtPrx46/At4g31760	88	NoffPrx46-1B /Nasoffncbi355g0215230
					lost
	TsPrx47 /Thhalv10025702m	91	AtPrx47/At4g33420	94	NoffPrx47-1B /Nasoffncbi671g0295590
				80	NoffPrx[P]47-1A /Nasoff109gxxx	83.1
	TsPrx48-1 /Thhalv10025607m	64	AtPrx48/At4g33870	76	NoffPrx48-1A /Nasoffncbi289g0191900
	TsPrx48-2 /Thhalv10027558m	74		77	NoffPrx48-1B /Nasoffncbi144g0124300	94.22
	TsPrx49-2 /Thhalv10025683m	87	AtPrx49/At4g36430	92	NoffPrx49-1A /Nasoffncbi12g0019660
	TsPrx[P]49-1 /Thhalv10000286m	87		93	NoffPrx49-1B /Nasoffncbi131g0117000	94.58
	TsPrx50 /Thhalv10025717m	77	AtPrx50/At4g37520	88	NoffPrx50-1A /Nasoffncbi12g0018750
				85	NoffPrx50-1B /Nasoffncbi922g0338450	90.91
	TsPrx51 /Thhalv10025695m	90	AtPrx51/At4g37530		lost
					lost
	TsPrx52 /Thhalv10014105m	91	AtPrx52/At5g05340	90	NoffPrx52-1B /Nasoffncbi7g0011250
				91	NoffPrx52-1A /Nasoffncbi394g0228310	95.37
	TsPrx53 /Thhalv10014029m	88	AtPrx53/At5g06720	93	NoffPrx53-1A /Nasoffncbi150g0128110
				79 P54	NoffPrx[P]53-1B /Nasoff164gxxx	90
	TsPrx54 /Thhalv10013916m	87	AtPrx54/At5g06730	89	NoffPrx54-1A /Nasoffncbi150g0128120
					lost
	TsPrx55 /Thhalv10014070m	76	AtPrx55/At5g14130	79	NoffPrx55-1A /Nasoffncbi17g0026560
				80	NoffPrx55-1B /Nasoffncbi466g0248540	95.2
	TsPrx56 /Thhalv10014085m	79	AtPrx56/At5g15180	85	NoffPrx56-1B /Nasoffncbi63g0071710
				82	NoffPrx56-1A /Nasoffncbi1266g0379390	91.44
	TsPrx57 /Thhalv10014171m	89	AtPrx57/At5g17820	89	NoffPrx57-1A /Nasoffncbi89g0090790
				90	NoffPrx57-1B /Nasoffncbi105g0101610	95.87
	TsPrx58-1 /Thhalv10014083m	90	AtPrx58/At5g19880	85	NoffPrx58-1A /Nasoffncbi251g0176160
	TsPrx58-2 /Thhalv10016025m	84			lost
	TsPrx59 /Thhalv10014080m	88	AtPrx59/At5g19890	89	NoffPrx59-1A /Nasoffncbi251g0176170
				88	NoffPrx59-1B /Nasoffncbi544g0267990	95.41
	TsPrx60 /Thhalv10015253m	73	AtPrx60/At5g22410	72	NoffPrx60-1A /Nasoffncbi145g0124890
				66	NoffPrx[P]60-1B /Nasoffncbi132gxxx	79.63
	TsPrx61 /Thhalv10004528m	91	AtPrx61/At5g24070	89	NoffPrx61-1A /Nasoffncbi1209g0373660
					lost
	TsPrx[P]62 /Thhalv10028309m	74	AtPrx62/At5g39580	87	NoffPrx62-1A /Nasoffncbi473g0250450
				86	NoffPrx62-1B /Nasoffncbi1330g0385640	94.34
	ns		AtPrx63/At5g40150		ns
					ns
	TsPrx64-1 /Thhalv10027848m	85	AtPrx64/At5g42180	89	NoffPrx64-1A /Nasoffncbi215g0159960
	TsPrx[P]64 /Thhalv10028329m	82		89	NoffPrx64-1B /Nasoffncbi3429g0467060	96.53
	TsPrx65 /Thhalv10000958m	90	AtPrx65/At5g47000	92	NoffPrx65-1A /Nasoffncbi426g0237490
				91	NoffPrx65-1B /Nasoffncbi524g0263080	97.28
	TsPrx66 /Thhalv10014117m	91	AtPrx66/ At5g51890	81	NoffPrx66-1B /Nasoffncbi368g0219680
				91	NoffPrx66-1A /Nasoffncbi483g0253030	92.53
	TsPrx67 /Thhalv10014097m	78	AtPrx67/At5g58390	78	NoffPrx67-1A /Nasoffncbi201g0154230
					lost
	ns		AtPrx68/At5g58400		ns
					ns
	TsPrx69 /Thhalv10004557m	86	AtPrx69/At5g64100	83	NoffPrx69-1A /Nasoffncbi3g0005220
				82	NoffPrx69-1B /Nasoffncbi666g0294600	91.82
	TsPrx70 /Thhalv10004567m	84	AtPrx70/At5g64110	80	NoffPrx70-1B /Nasoffncbi666g0294610
				74	NoffPrx[P]70-1A /Nasoffncbi3gxxx	87.5
	TsPrx71 /Thhalv10004581m	86	AtPrx71/At5g64120	80	NoffPrx71-1A /Nasoffncbi3g0005200
				83	NoffPrx71-1B /Nasoffncbi666g0294620	93.5
				79	NoffPrx71-2A /Nasoffncbi1124g0363800	85.4
	TsPrx72 /Thhalv10004548m	93	AtPrx72/At5g66390	94	NoffPrx72-1A /Nasoffncbi186g0146750
				94	NoffPrx72-1B /Nasoffncbi238g0170560	98.81
	TsPrx73 /Thhalv10004576m	83	AtPrx73/At5g67400	87	NoffPrx73-1B /Nasoffncbi176g0141800
				86	NoffPrx73-1A /Nasoffncbi655g0292200	97.87
	66+8 Ψ		73+2 Ψ		111 + 17 Ψ

## Sheet: Table S3
	Table S3. APxs, Kats, CIII Prxs, DiOxs, RBOHs and SODs differential expression analysis under salt and hypoxia stress in the three selected Brassicaceae species. The gene nomenclature is derived from the online database Redoxibase (https://peroxibase.toulouse.inrae.fr/). Differential expression data are presented in log2(FC), except for A. thaliana under hypoxia conditions, which are in the form …
		Salt stress			Hypoxia					Salt stress			Hypoxia
	E. salsugineum - Redoxibase ID	E. salsugineum salt log2(FC)	A. thaliana salt log2(FC)	A. thaliana - Redoxibase ID	A. thaliana hypoxia HN-score	N. officinale hypoxia log2(FC)	N. officinale Redoxibase ID		E. salsugineum Redoxibase ID	E. salsugineum salt log2(FC)	A. thaliana salt log2(FC)	A. thaliana - Redoxibase ID	A. thaliana hypoxia HN-score	N. officinale hypoxia log2(FC)	N. officinale Redoxibase ID
	Class III peroxidases (Prxs)								Ascorbate peroxidases (APxs)
	TsPrx01 / Thhalv10008202	-3.03253	-5.62766	AtPrx01 / At1g05240	0	no transcript	NoffPrx01-1A		TsAPx-R / Thhalv10025686m	0.955829	FDR>0.05	AtAPx-R / At4g32320	-2	FDR>0.05	NoffAPx-R01-1A
						no transcript	NoffPrx01-1B							FDR>0.05	NoffAPx-R01-1B
	TsPrx02 / Thhalv10008157	-2.88242	FDR>0.05	AtPrx02 / At1g05250	-4	no transcript	NoffPrx02-1A		TsAPx01 / Thhalv10008402m	0.667543	-1.40784	AtAPx01 / At1g07890	2	1.23	NoffAPx01-1A
						no transcript	NoffPrx02-1B							1.23	NoffAPx01-1B
						no transcript	NoffPrx02-2B		TsAPx02 / Thhalv10021381m	1.87188	FDR>0.05	AtAPx02 / At3g09640	1	-3.56	NoffAPx02-1A
	TsPrx03 / Thhalv10008189	-0.686035	FDR>0.05	AtPrx03 / At1g05260	-1	-0.963411	NoffPrx03-1A
						[P]	NoffPrx[P]03-1B		TsAPx03-1A / Thhalv10025911m	FDR>0.05	FDR>0.05	AtAPx03 / At4g35000	-1	FDR>0.05	NoffAPx03-1A
	TsPrx04-1 / Thhalv10008244	FDR>0.05	FDR>0.05	AtPrx04 / At1g14540	15	FDR>0.05	NoffPrx04-1B		TsAPx03-1B / Thhalv10023023m	no transcript				FDR>0.05	NoffAPx03-1B
	TsPrx04-2 / Thhalv10023814	no transcript							TsAPx03-1C / Thhalv10022797m	FDR>0.05
	TsPrx[P]05	no transcript	FDR>0.05	AtPrx05 / At1g14550	6	no transcript	NoffPrx05-1A		TsAPx04 / Thhalv10025942m	FDR>0.05	FDR>0.05	AtAPx04 / At4g35970	-1	-0.968441	NoffAPx04-1A
						no transcript	NoffPrx05-1B							[P]	NoffAPx[P]04-1B
	TsPrx06 / Thhalv10009658	no transcript	no transcript	AtPrx06 / At1g24110	0	no transcript	NoffPrx06-1A		TsAPx05 / Thhalv10028759m	FDR>0.05	FDR>0.05	AtAPx05 / At4g08390	-1	-1.69719	NoffAPx05-1A
						[P]	NoffPrx[P]06-1B
	TsPrx07 / Thhalv10008077	-2.48642	-3.25162	AtPrx07 / At1g30870	-4	no transcript	NoffPrx07-1A		TsAPx06 / Thhalv10018581m	FDR>0.05	FDR>0.05	AtAPx06 / At1g77490	-5	FDR>0.05	NoffAPx06-1A
						no transcript	NoffPrx07-1B							[P]	NoffAPx[P]06-1B
	no sequence		-4.04316	AtPrx08 / At1g34510	-13		no sequence		TsAPx07 / Thhalv10028741m	no transcript	FDR>0.05	AtAPx07 / At4g09010	-4	-0.965693	NoffAPx07-1A
			no transcript	AtPrx[P]08										-0.965693	NoffAPx07-1B
	TsPrx09 / Thhalv10011616	FDR>0.05	FDR>0.05	AtPrx09 / At1g44970	-3	5.55932	NoffPrx09-1B				no transcript	AtAPx[P]08
	TsPrx10 / Thhalv10011619	-3.01331	15.8741	AtPrx10 / At1g49570	9	6.02	NoffPrx10-1A		a-Dioxygenases (DiOxs)
						6.02	NoffPrx10-1B		TsDiOx01 / Thhalv10020279	-3.33404	FDR>0.05	AtDiOx01 / At3g01420	-1	FDR>0.05	NoffDiOx01-1A
	TsPrx11 / Thhalv10018830	0.966221	FDR>0.05	AtPrx11 / At1g68850	-2	no transcript	NoffPrx11-1A
						no transcript	NoffPrx11-1B		TsDiOx02 / Thhalv10018266	0.974419	FDR>0.05	AtDiOx02 / At1g73680	5	1.58809	NoffDiOx02-1A
	TsPrx12 / Thhalv10018753	-2.06646	FDR>0.05	AtPrx12 / At1g71695	-9	FDR>0.05	NoffPrx12-1A							1.58809	NoffDiOx02-1B
						FDR>0.05	NoffPrx12-1B
	TsPrx13 / Thhalv10019514	no transcript	no FDR	AtPrx13 / At1g77100	0	no transcript	NoffPrx13-1B		NADPH oxidases / Respiratory Burst Oxidase Homologs (Rbohs)
	TsPrx[P]13 / Thhalv10019729	no transcript				[P]	NoffPrx[P]13-1A		TsRboh01 / Thhalv10012617	no transcript	FDR>0.05	AtRboh01 / At5g07390	0	no transcript	NoffRboh01-1A
	no sequence		FDR>0.05	AtPrx14 / At2g18140	0									no transcript	NoffRboh01-1B
									TsRboh02 / Thhalv10006793	no transcript	FDR>0.05	AtRboh02 / At1g09090	1	5.83	NoffRboh02-1A
	TsPrx15 / Thhalv10022774	FDR>0.05	FDR>0.05	AtPrx15 / At2g18150	-3	no transcript	NoffPrx15-1A
						no transcript	NoffPrx15-1B		TsRboh03 / Thhalv10012613	FDR>0.05	-1.45887	AtRboh03 / At5g51060	3	no transcript	NoffRboh03-1A
	no sequence		FDR>0.05	AtPrx16 / At2g18980	-5	3.18107	NoffPrx16-1A							no transcript	NoffRboh03-1B
									TsRboh04 / Thhalv10003619	FDR>0.05	-1.39537	AtRboh04 / At5g47910	26	-0.395959	NoffRboh04-1A
	TsPrx17 / Thhalv10000239	FDR>0.05	FDR>0.05	AtPrx17 / At2g22420	-1	FDR>0.05	NoffPrx17-1A							-0.395959	NoffRboh04-1B
	TsPrx[P]17-1 / Thhalv10000442	no transcript				FDR>0.05	NoffPrx17-1B		TsRboh05 / Thhalv10006725	no transcript	FDR>0.05	AtRboh05 / At1g19230	0	1.38	NoffRboh05-1A
	TsPrx[P]17-2 / Thhalv10026826	no transcript				FDR>0.05	NoffPrx17-2B							1.38	NoffRboh05-1B
	TsPrx18 / Thhalv10000495	no transcript	FDR>0.05	AtPrx18 / At2g24800	0	no transcript	NoffPrx18-1A		TsRboh06 / Thhalv10023240	FDR>0.05	FDR>0.05	AtRboh06 / At1g64060	1	FDR>0.05	NoffRboh06-1A
						no transcript	NoffPrx18-1B							FDR>0.05	NoffRboh06-1B
	TsPrx19 / Thhalv10016874	no transcript	FDR>0.05	AtPrx19 / At2g34060	-2	-1.75	NoffPrx19-1A		TsRboh07-1 / Thhalv10024427	no transcript	FDR>0.05	AtRboh07 / At4g25090	-1	FDR>0.05	NoffRboh07-1B
						[P]	NoffPrx[P]19-1B		TsRboh07-2 / Thhalv10024426	no transcript				[P]	NoffRboh[P]07-1A
	TsPrx20 / Thhalv10016900	FDR>0.05	FDR>0.05	AtPrx20 / At2g35380	0	FDR>0.05	NoffPrx20-1B		TsRboh08 / Thhalv10016055	no transcript	no FDR	AtRboh08 / At5g60010	0	no transcript	NoffRboh08-1A
						FDR>0.05	NoffPrx[P]20-1A							[P]	NoffRboh[P]08-1B
	TsPrx21 / Thhalv10016921	FDR>0.05	-1.73772	AtPrx21 / At2g37130	2	FDR>0.05	NoffPrx21-1A		TsRboh09 / Thhalv10028400m	no transcript	FDR>0.05	AtRboh09 / At4g11230	3	no transcript	NoffRboh09-1B
						FDR>0.05	NoffPrx21-1B							[P]	NoffRboh[P]09-1A
	no sequence		FDR>0.05	AtPrx22 / At2g38380	-1	6.16	NoffPrx22-1A		TsRboh10 / Thhalv10003051	no transcript	no FDR	AtRboh10 / At3g45810	0	no transcript	NoffRboh10-1A
						6.16	NoffPrx22-2A							[P]	NoffRboh[P]10-1B
							NoffPrx22-2B
									Catalases (Kats)
	TsPrx23 / Thhalv10016868	FDR>0.05	FDR>0.05	AtPrx23 / At2g38390	-2	6.36	NoffPrx23-1A		TsKat01 / Thhalv10007472	1,90	1.4	AtKat01 / At1g20630	-2	FDR>0.05	NoffKat01-1B
														[P]	NoffKat[P]01-1A
	TsPrx24 / Thhalv10016858	FDR>0.05	FDR>0.05	AtPrx24 / At2g39040	-5				TsKat02 / Thhalv10025015	no transcript	1.32	AtKat02 / At4g35090	-4	FDR>0.05	NoffKat02-1A
														FDR>0.05	NoffKat02-1B
	TsPrx25 / Thhalv10016924	-0.889082	FDR>0.05	AtPrx25 / At2g41480	-11	no transcript	NoffPrx25-1A		TsKat03 / Thhalv10007795	FDR>0.05	FDR>0.05	AtKat03 / At1g20620	-7	-1.2586	NoffKat03-1A
						no transcript	NoffPrx25-1B		TsKat[P]04	[P]				-1.2586	NoffKat03-1B
	TsPrx26 / Thhalv10001541	no transcript	FDR>0.05	AtPrx26 / At2g43480	0	no transcript	NoffPrx26-1A
						[P]	NoffPrx[P]26-1B		Superoxide dismutases (CSDs, FSDs, MSDs,CCS)
	TsPrx27 / Thhalv10021152	-1.96088	FDR>0.05	AtPrx27 / At3g01190	-2	3.83088	NoffPrx27-1A		TsCSD01 / Thhalv10008927	FDR>0.05	1.8	AtCSD01 / At1g08830	2	0.98072	NoffCSD01-1A
						3.83088	NoffPrx27-1B							0.98072	NoffCSD01-1B
	TsPrx28 / Thhalv10021155	-2.01528	no FDR	AtPrx28 / At3g03670	5	no transcript	NoffPrx28-1A		TsCSD02 / Thhalv10017094	FDR>0.05	1,77	AtCSD02 / At2g28190	-1	FDR>0.05	NoffCSD02-1A
						no transcript	NoffPrx28-1B							FDR>0.05	NoffCSD02-1B
						[P]	NoffPrx[P]28-2B		TsCSD03 / Thhalv10014873	FDR>0.05	FDR>0.05	AtCSD03 / At5g18100	-1	0.742421	NoffCSD03-1A
	TsPrx29 / Thhalv10021081	FDR>0.05	FDR>0.05	AtPrx29 / At3g17070	-12	-1.43543	NoffPrx29-1B							0.742421	NoffCSD03-1B
			no transcript	AtPrx[P]29 / At3g42570	0	[P]	NoffPrx[P]29-1A		TsFSD01-1A / Thhalv10026218	1,11	FDR>0.05	AtFSD01 / At4g25100	3	-5.38192	NoffFSD01-1A
	TsPrx30 / Thhalv10021123	-0.850729	FDR>0.05	AtPrx30 / At3g21770	-3	FDR>0.05	NoffPrx30-1A							-5.38192	NoffFSD01-1B
									TsFSD02 / Thhalv10014192	FDR>0.05	FDR>0.05	AtFSD02 / At5g51100	-2	FDR>0.05	NoffFSD02-1A
	TsPrx31 / Thhalv10004596	FDR>0.05	FDR>0.05	AtPrx31 / At3g28200	0	FDR>0.05	NoffPrx31-1A							FDR>0.05	NoffFSD02-1B
						FDR>0.05	NoffPrx31-1B		TsFSD03 / Thhalv10004781	FDR>0.05	FDR>0.05	AtFSD03 / At5g23310	-4	FDR>0.05	NoffFSD03-1A
	TsPrx32 / Thhalv10022759	FDR>0.05	FDR>0.05	AtPrx32 / At3g32980	-2	FDR>0.05	NoffPrx32-1A							FDR>0.05	NoffFSD03-1B
									TsMSD01-1A / Thhalv10021449	0,61	FDR>0.05	AtMSD01 / At3g10920	-1	FDR>0.05	NoffMSD01-1A
	no sequence		FDR>0.05	AtPrx33 / At3g49110	-1	FDR>0.05	NoffPrx33-1A							FDR>0.05	NoffMSD01-1B
						FDR>0.05	NoffPrx33-1B		TsSDL01 / Thhalv10006477	no transcript	FDR>0.05	AtSDL01 / At3g56350	0	[P]	NoffSDL0[P]1-1A
	TsPrx34 / Thhalv10010494	FDR>0.05	-1.69299	AtPrx34 / At3g49120	5	[P]	NoffPrx[P]34-1A							no transcript	NoffSDL01-1B
						[P]	NoffPrx[P]34-1B		TsCCS01 / Thhalv10008232	FDR>0.05	1.92	AtCCS01 / At1g12520	-3	1.97	NoffCCS01-1A
	TsPrx35 / Thhalv10010538	FDR>0.05	-3.60935	AtPrx35 / At3g49960	-6	no transcript	NoffPrx35-1B							1.97	NoffCCS01-1B
						[P]	NoffPrx[P]35-1A
	TsPrx36 / Thhalv10011077	no transcript	FDR>0.05	AtPrx36 / At3g50990	0	no transcript	NoffPrx36-1B
	TsPrx37 / Thhalv10028769	no transcript	FDR>0.05	AtPrx37 / At4g08770	9	4.74	NoffPrx37-1A
						4.74	NoffPrx37-1B
	no sequence		FDR>0.05	AtPrx38 / At4g08780	0	2.42	NoffPrx38-1A
	TsPrx39 / Thhalv10028797	-2.7976	FDR>0.05	AtPrx39 / At4g11290	-2	FDR>0.05	NoffPrx39-1A
						FDR>0.05	NoffPrx39-1B
	TsPrx40 / Thhalv10025534	FDR>0.05	FDR>0.05	AtPrx40 / At4g16270	-1	FDR>0.05	NoffPrx40-1A
						[P]	NoffPrx[P]40-1B
	TsPrx41 / Thhalv10025673	FDR>0.05	NoFDR	AtPrx41 / At4g17690	0	no transcript	NoffPrx41-1A
						[P]	NoffPrx[P]41-1B
	TsPrx42 / Thhalv10025680	FDR>0.05	-1.28554	AtPrx42 / At4g21960	-6	-1.12922	NoffPrx42-1A
						-1.12922	NoffPrx42-1B
	TsPrx43 / Thhalv10025604	no transcript	FDR>0.05	AtPrx43 / At4g25980	0	no transcript	NoffPrx43-1A
						no transcript	NoffPrx43-1B
	TsPrx44 / Thhalv10025781	-2.35447	-2.80616	AtPrx44 / At4g26010	-3	no transcript	NoffPrx44-1A
	TsPrx[P]44 / Thhalv10026803	no transcript				no transcript	NoffPrx44-1B
						no transcript	NoffPrx44-2A
						no transcript	NoffPrx44-2B
	TsPrx45 / Thhalv10025699	-1.65443	FDR>0.05	AtPrx45 / At4g30170	-4	2.86847	NoffPrx45-1A
						2.86847	NoffPrx45-1B
	TsPrx46 / Thhalv10025685	FDR>0.05	FDR>0.05	AtPrx46 / At4g31760	10	FDR>0.05	NoffPrx46-1B
	TsPrx47 / Thhalv10025702	FDR>0.05	FDR>0.05	AtPrx47 / At4g33420	4	2.33	NoffPrx47-1B
						[P]	NoffPrx[P]47-1A
	TsPrx48-1 / Thhalv10025607	FDR>0.05	FDR>0.05	AtPrx48 / At4g33870	0	no transcript	NoffPrx48-1A
	TsPrx48-2 / Thhalv10027558	no transcript				no transcript	NoffPrx48-1B
	TsPrx49-2 / Thhalv10025683	1.00344	1.72803	AtPrx49 / At4g36430	0	FDR>0.05	NoffPrx49-1A
	TsPrx[P]49-1 / Thhalv10000286	FDR>0.05				FDR>0.05	NoffPrx49-1B
	TsPrx50 / Thhalv10025717	no transcript	1.60851	AtPrx50 / At4g37520	1	2.46	NoffPrx50-1A
						2.45714	NoffPrx50-1B
	TsPrx51 / Thhalv10025695	FDR>0.05	FDR>0.05	AtPrx51 / At4g37530	0
	TsPrx52 / Thhalv10014105	1.03695	6.00836	AtPrx52 / At5g05340	2	3.02	NoffPrx52-1A
						3.02	NoffPrx52-1B
	TsPrx53 / Thhalv10014029	no transcript	FDR>0.05	AtPrx53 / At5g06720	-3	no transcript	NoffPrx53-1A
						no transcript	NoffPrx[P]53-1B
	TsPrx54 / Thhalv10013916	no transcript	-1.96597	AtPrx54 / At5g06730	0	FDR>0.05	NoffPrx54-1A
	TsPrx55 / Thhalv10014070	FDR>0.05	FDR>0.05	AtPrx55 / At5g14130	0	no transcript	NoffPrx55-1A
						no transcript	NoffPrx55-1B
	TsPrx56 / Thhalv10014085	-1.44327	FDR>0.05	AtPrx56 / At5g15180	-2	4.27116	NoffPrx56-1A
						4.27116	NoffPrx56-1B
	TsPrx57 / Thhalv10014171	-2.10202	-1.81188	AtPrx57 / At5g17820	-2	no transcript	NoffPrx57-1A
						no transcript	NoffPrx57-1B
	TsPrx58-1 / Thhalv10014083	-2.15266	FDR>0.05	AtPrx58 / At5g19880	2	FDR>0.05	NoffPrx58-1A
	TsPrx58-2 / Thhalv10016025	no transcript
	TsPrx59 / Thhalv10014080	-2.84387	FDR>0.05	AtPrx59 / At5g19890	6	no transcript	NoffPrx59-1A
						no transcript	NoffPrx59-1B
	TsPrx60 / Thhalv10015253	no transcript	-5.01373	AtPrx60 / At5g22410	-10	no transcript	NoffPrx60-1A
						[P]	NoffPrx[P]60-1B
	TsPrx61 / Thhalv10004528	FDR>0.05	FDR>0.05	AtPrx61 / At5g24070	6	no transcript	NoffPrx61-1A
	TsPrx[P]62 / Thhalv10028309	no transcript	FDR>0.05	AtPrx62 / At5g39580	11	8.25797	NoffPrx62-1A
						8.25797	NoffPrx62-1B
	no sequence		FDR>0.05	AtPrx63 / At5g40150	-11		no sequence
	TsPrx64-1 / Thhalv10027848	no transcript	FDR>0.05	AtPrx64 / At5g42180	-2	1.92107	NoffPrx64-1A
	TsPrx[P]64 / Thhalv10028329	no transcript				1.92107	NoffPrx64-1B
	TsPrx65 / Thhalv10000958	FDR>0.05	FDR>0.05	AtPrx65 / At5g47000	-1	no transcript	NoffPrx65-1A
						no transcript	NoffPrx65-1B
	TsPrx66 / Thhalv10014117	2.43361	FDR>0.05	AtPrx66 / At5g51890	-8	-2.29	NoffPrx66-1A
						-2.29	NoffPrx66-1B
	TsPrx67 / Thhalv10014097	FDR>0.05	FDR>0.05	AtPrx67 / At5g58390	-2	4.58629	NoffPrx67-1A
	no sequence			AtPrx68 / At5g58400	0
	TsPrx69 / Thhalv10004557	-0.620438	FDR>0.05	AtPrx69 / At5g64100	9	8.18659	NoffPrx69-1A
						8.18659	NoffPrx69-1B
	TsPrx70 / Thhalv10004567	FDR>0.05	FDR>0.05	AtPrx70 / At5g64110	-2	[P]	NoffPrx[P]70-1A
						-5.71	NoffPrx70-1B
	TsPrx71 / Thhalv10004581	-1.31244	-1.78979	AtPrx71 / At5g64120	11	3.47371	NoffPrx71-1A
						3.47371	NoffPrx71-1B
						3.47371	NoffPrx71-2A
	TsPrx72 / Thhalv10004548	FDR>0.05	FDR>0.05	AtPrx72 / At5g66390	-2	FDR>0.05	NoffPrx72-1A
						FDR>0.05	NoffPrx72-1B
	TsPrx73 / Thhalv10004576	-1.29945	-4.12931	AtPrx73 / At5g67400	-4	FDR>0.05	NoffPrx73-1A
						FDR>0.05	NoffPrx73-1B
